# Supplementary material for: Construction of a novel S-scheme AgVO3/CaIn2S4 heterostructure for efficient photodegradation of tetracycline hydrochloride
Source: Royal Society of Chemistry journal article supplement (doi:10.1039/d4dt01349b), 2024-01-01
Supplement: d4dt01349b1.pdf [file d4dt01349b1.pdf]

## Supporting information

### Computational details

In this study, the Vienna ab initio Simulation Package (VASP) within the frame of density functional theory (DFT) was utilized for all calculations. The exchange-correlation interactions of electrons were described using the generalized gradient approximation (GGA) with PBE functional. The interactions of electron and ion were characterized using the projector augmented wave (PAW) method. The Monkhorst-Pack scheme with a  $3 \times 3 \times 1$  k-point mesh was employed for the integration in the irreducible Brillouin zone. A plane wave expansion with a cut-off energy of 500 eV was selected for the calculations. The lattice parameters and ionic position were fully relaxed, and the total energy was converged to within  $10^{-4}$  eV per formula unit. The final forces on all ions were maintained below  $0.01/\text{\AA}$ .

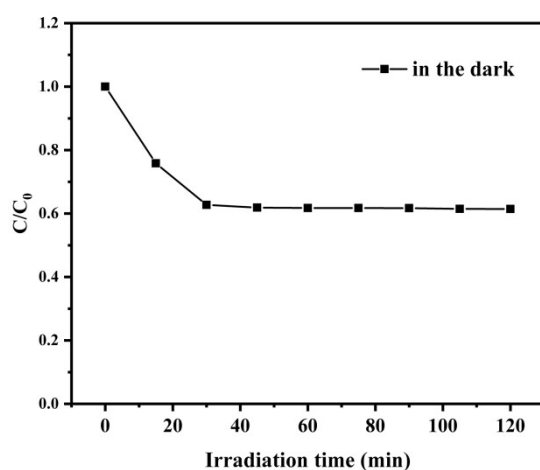

Fig. S1 The adsorption experiments of the AC-0.025 sample toward TCH for 120 min in dark.

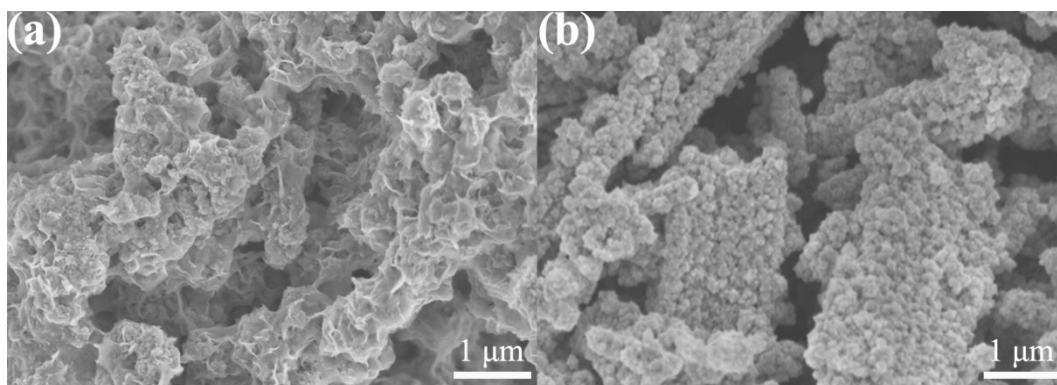

Fig. S2 SEM images of (a) AC-0.01, (b) AC-0.05.

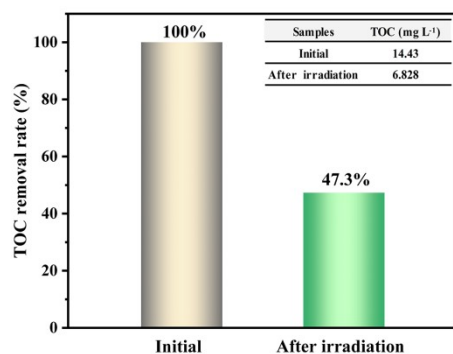

Fig. S3 TOC removal ratio of TCH by AC-0.025.

Table S1. Performance comparison of AgVO<sub>3</sub>/CaIn<sub>2</sub>S<sub>4</sub> with previously reported photodegradation of TCH by systems based on AgVO<sub>3</sub> and CaIn<sub>2</sub>S<sub>4</sub>.

| Photocatalysts                                                                  | Light source                        | Concentration (mg L <sup>-1</sup> ) of TCH | Catalyst amount/volume of TCH  | Degradation (%), illumination time (min) | Ref.       |
|---------------------------------------------------------------------------------|-------------------------------------|--------------------------------------------|--------------------------------|------------------------------------------|------------|
| CaIn <sub>2</sub> S <sub>4</sub> -Ti <sub>3</sub> C <sub>2</sub> T <sub>x</sub> | halogen lamp<br>(400 W, λ > 420 nm) | 20                                         | 50 mg/50 mL                    | 92, 150                                  | S1         |
| KBi <sub>6</sub> O <sub>9</sub> I/Ag-AgVO <sub>3</sub>                          | halogen bulb<br>(400 W)             | 25/50                                      | 200 mg/200 mL                  | 88.3/83.5, 120                           | S2         |
| AgVO <sub>3</sub> /Ag <sub>4</sub> V <sub>2</sub> O <sub>7</sub> /BiOI          | halogen lamp<br>(1000 W)            | 10                                         | 0.1 g/100 mL                   | 100, 80                                  | S3         |
| AgVO <sub>3</sub> /UiO-66                                                       | Xe lamp<br>(300 W)                  | 10                                         | 20 mg/100 mL                   | 78.5, 60                                 | S4         |
| AgVO <sub>3</sub> /Ag <sub>2</sub> S                                            | Xe lamp<br>(300 W, λ > 400 nm)      | 20                                         | 10 mg/100 mL                   | 70.45, 120                               | S5         |
| AgVO <sub>3</sub> /BiVO <sub>4</sub> /graphene                                  | Xe lamp<br>(500 W, 420 nm filter)   | 50                                         | --/50 mL                       | 92, 80                                   | S6         |
| AgVO <sub>3</sub> /Bi <sub>4</sub> Ti <sub>3</sub> O <sub>12</sub>              | Xe lamp<br>(300 W, λ > 420 nm)      | 5                                          | 30 mg/100 mL                   | 57, 60                                   | S7         |
| Ag-AgVO <sub>3</sub> /g-C <sub>3</sub> N <sub>4</sub>                           | Xe lamp<br>(300 W, 410 nm filter)   | 15/200                                     | 0.04 g/200 mL                  | 83.6, 120                                | S8         |
| AgVO <sub>3</sub> /RGO/C <sub>3</sub> N <sub>4</sub> -PVDF                      | Xe lamp<br>(300 W, λ > 400 nm)      | 10                                         | 5.4×5.9 cm <sup>2</sup> /50 mL | 88.53, 120                               | S9         |
| AgVO <sub>3</sub> /CaIn <sub>2</sub> S <sub>4</sub>                             | Xe lamp<br>(500 W, λ > 420 nm)      | 20                                         | 1 g/L <sup>-1</sup>            | 94.1, 80                                 | This study |

## References

- S1 Z. H. Zhu, X. J. Liu, T. Q. Chen, Y. Y. Gong, C. Li, L. Y. Niu, S.Q. Xu, X. T. Xu, Z. A. Alothman, C. Q. Sun, J. G. Shapter, Y. Tamauchi, *Chem. Eng. J.*, 2021, **421**, 127838.

- S2 A. Ebrahimi, M. Haghghi, M. Shabani, *Env. Pollution.*, 2024, **346**, 123584.
- S3 J. H. Yu, J. X. Dong, X. L. Su, J. Yang, D. Zhang, J. C. Liu, P. Q. Cai, Z. P. Li, D. F. Zhang, X. P. Pu, *J. Alloy. Compd.*, 2024, **987**, 174187.
- S4 M. Zhu, X. C. Huang, Y. Zhu, H. J. Zhang, S. X. Lu, *Chem. Phys. Impact.*, 2023, **7**, 100333.
- S5 Y. B. Liu, N. Liu, M. H. Lin, C. F. Huang, Z. J. Lei, H. S. Cao, F. G. Qi, X. P. Ouyang, Y. Zhou, *Env. Pollution.*, 2023, **325**, 121436.
- S6 Y. Wang, M. L. Chen, Q. Xie, B. L. Wang, L. Lin, Y. Y. Jiang, L. Zhang, Y. Zhao, Y. S. Zhang, M. J. Zhao, *Aust. J. Chem.*, 2022, **75(6)**, 387.
- S7 Y. B. Chen, Y. Zhou, J. Zhang, J. X. Li, T. T. Tao, A. N. Chen, Z. Y. Chen, *J. Phys. Chem. Solids.*, 2022, **161**, 110428.
- S8 D. Y. Chen, B. L. Li, Q. M. Pu, X. Chen, G. Wen, Z. S. Li, *J. Hazard. Mater.*, 2019, **373**, 302.
- S9 Y. H. Cui, Z. K. Wang, J. Zheng, B. R. Li, Y. S. Yan, M. J. Meng, *J. Colloid. Interf. Sci.*, 2022, **614**, 677-689.
